# Supplementary material for: Genome-Based Characterization of Emergent Invasive Neisseria meningitidis Serogroup Y Isolates in Sweden from 1995 to 2012
Source: PubMed Central journal article supplement (PMC4473204; doi:10.1128/jcm.03524-14), 2015-06-18
Supplement: JCM.03524-14_zjm999094338so2.pdf [file JCM.03524-14_zjm999094338so2.pdf]

**Supplementary Table 1.** Finotyping information on all Swedish *Neisseria meningitidis* serogroup Y isolates belonging to the ST-23 clonal complex divided into different strain types.

| Strain type <sup>a</sup> | Frequency (%) | Finotyping                           |                        |                        |                     | Extended finotyping    |       |      |        | Whole-genome lineage |
|--------------------------|---------------|--------------------------------------|------------------------|------------------------|---------------------|------------------------|-------|------|--------|----------------------|
|                          |               | ST <sup>b</sup> (MLST <sup>c</sup> ) | PorA VR <sup>d</sup> 1 | PorA VR <sup>d</sup> 2 | FetAVR <sup>d</sup> | PorA VR <sup>d</sup> 3 | 'porB | fHbp | penA   |                      |
| YI                       | 80 (42.78)    | 23                                   | 5-2                    | 10-1                   | F4-1                | 36-2                   | 3-36  | 25   | 22     | 23.1                 |
| N/A                      | 5 (2.67)      | 23                                   | 5-2                    | 10-1                   | F4-1                | 36-2                   | 3-36  | 25   | absent | 23.1                 |
| N/A                      | 5 (2.67)      | 2692                                 | 5-2                    | 10-1                   | F4-1                | 36-2                   | 3-36  | 25   | 22     | 23.1                 |
| N/A                      | 4 (2.14)      | 23                                   | 5-2                    | 10-28                  | F4-1                | 36-2                   | 3-36  | 25   | 22     | 23.1                 |
| N/A                      | 3 (1.6)       | 23                                   | 5-2                    | 10-1                   | F4-1                | 36-2                   | 3-117 | 25   | 22     | 23.1                 |
| N/A                      | 2 (1.07)      | 23                                   | 5-2                    | 10-85                  | F4-1                | 36-2                   | 3-36  | 25   | 22     | 23.1                 |
| N/A                      | 2 (1.07)      | 23                                   | 5-2                    | 10-12                  | F4-1                | 36-2                   | 3-36  | 25   | 22     | 23.1                 |
| N/A                      | 1 (0.53)      | 23                                   | 5-2                    | 10-1                   | F4-1                | 36-2                   | 3-36  | 25   | 14     | 23.1                 |
| N/A                      | 1 (0.53)      | 23                                   | 5-2                    | 10-1                   | F4-1                | 36-2                   | 3-36  | 25   | 352    | 23.1                 |
| N/A                      | 1 (0.53)      | 23                                   | 5-2                    | 10-1                   | F4-1                | 36-2                   | 3-36  | 276  | 22     | 23.1                 |
| N/A                      | 1 (0.53)      | 23                                   | 5-2                    | 10-1                   | F4-1                | 36-2                   | 3-36  | 478  | 22     | 23.1                 |
| N/A                      | 1 (0.53)      | 23                                   | 5-2                    | 10-1                   | F4-1                | 36-2                   | 3-454 | 25   | 22     | 23.1                 |
| N/A                      | 1 (0.53)      | 23                                   | 5-2                    | 10-1                   | F4-1                | 36-2                   | 3-117 | 25   | 9      | 23.1                 |
| N/A                      | 1 (0.53)      | 23                                   | 5-2                    | 10-1                   | F4-1                | 36-2                   | 3-36  | 144  | absent | 23.1                 |
| N/A                      | 1 (0.53)      | 23                                   | 5-2                    | 10-1                   | F3-22               | 36-2                   | 3-36  | 25   | absent | 23.1                 |
| N/A                      | 1 (0.53)      | 23                                   | 5-2                    | 10-29                  | F4-1                | 36-2                   | 3-36  | 25   | 22     | 23.1                 |
| N/A                      | 1 (0.53)      | 23                                   | 5-2                    | 10-12                  | F4-1                | 36-2                   | 3-36  | 25   | absent | 23.1                 |
| N/A                      | 1 (0.53)      | 23                                   | 5-2                    | 10-51                  | F4-1                | 36-2                   | 3-158 | 25   | 22     | 23.1                 |
| N/A                      | 1 (0.53)      | 10213                                | 5-2                    | 10-28                  | F4-1                | 36-2                   | 3-36  | 25   | 22     | 23.1                 |
| N/A                      | 1 (0.53)      | 10098                                | 5-2                    | 10-1                   | F4-1                | 36-2                   | 3-455 | 25   | 22     | 23.1                 |
| N/A                      | 1 (0.53)      | 2692                                 | 5-2                    | 10-3                   | F4-1                | 36-2                   | 3-36  | 25   | 22     | 23.1                 |
| N/A                      | 1 (0.53)      | 23                                   | 5                      | 2                      | F4-1                | 36-2                   | 3-36  | 25   | 22     | 23.1                 |
| YIV                      | 6 (3.21)      | 23                                   | 5-2                    | 10-1                   | F5-12               | 36-2                   | 3-36  | 25   | 22     | 23.1                 |
| N/A                      | 1 (0.53)      | 9299                                 | 5-2                    | 10-1                   | F5-12               | 36-2                   | 3-307 | 25   | 22     | 23.1                 |
| N/A                      | 1 (0.53)      | 23                                   | 5-1                    | 10-4 <sup>d</sup>      | F4-1                | 36-2                   | 3-36  | 25   | 22     | 23.1                 |
| N/A                      | 1 (0.53)      | 1655                                 | 5-1                    | 10-4 <sup>d</sup>      | F4-1                | 36-2                   | 3-36  | 25   | 22     | 23.1                 |
| N/A                      | 1 (0.53)      | 1655                                 | 5-1                    | 10-1                   | F4-1                | 36-2                   | 3-117 | 25   | 22     | 23.1                 |
| YII                      | 18            | 23                                   | 5-1                    | 2-2                    | F5-8                | 36-2                   | 2-55  | 25   | 22     | 23.2                 |
| N/A                      | 5 (2.67)      | 23                                   | 5-1                    | 2-2                    | F1-18               | 36-2                   | 2-55  | 25   | 22     | 23.2                 |
| N/A                      | 5 (2.67)      | 1625                                 | 5-1                    | 2-2                    | F5-8                | 36-2                   | 2-55  | 25   | 22     | 23.2                 |
| N/A                      | 4 (2.14)      | 3801                                 | 5-1                    | 2-2                    | F5-8                | 36-2                   | 2-55  | 25   | 22     | 23.2                 |
| N/A                      | 2 (1.07)      | 8043                                 | 5-1                    | 2-2                    | F5-8                | 36-2                   | 2-55  | 25   | 22     | 23.2                 |
| N/A                      | 1 (0.53)      | 4988                                 | 5-1                    | 2-2                    | -                   | 36-2                   | 3-36  | 25   | 22     | 23.2                 |
| N/A                      | 1 (0.53)      | 23                                   | 5-1                    | 2-2                    | F1-68               | 36-2                   | 2-55  | 25   | 22     | 23.2                 |
| N/A                      | 1 (0.53)      | 23                                   | 5-1                    | 2-2                    | F5-8                | 36-2                   | 2-55  | 25   | 342    | 23.2                 |
| N/A                      | 1 (0.53)      | 10210                                | 5-1                    | 2-2                    | F1-18               | 36-2                   | 2-55  | 25   | 22     | 23.2                 |

|             |          |     |     |      |      |      |       |     |    |      |
|-------------|----------|-----|-----|------|------|------|-------|-----|----|------|
| <b>YIII</b> | 8 (4.28) | 23  | 5-1 | 2-2  | F5-8 | 36-2 | 3-36  | 25  | 1  | 23.2 |
| <b>N/A</b>  | 1 (0.53) | 23  | 5-1 | 2-2  | F5-8 | 36-2 | 3-117 | 25  | 1  | 23.2 |
| <b>N/A</b>  | 1 (0.53) | 23  | 5-1 | 2-2  | F5-8 | 36-2 | 3-36  | 814 | 1  | 23.2 |
| <b>N/A</b>  | 1 (0.53) | 183 | 5-2 | 10-2 | F4-1 | 36-2 | 3-53  | 104 | 22 | 23.3 |

N/A=not applicable

<sup>a</sup>Strain types are defined by isolates with identical sequence types, clonal complex, PorA variable regions 1,2 and 3, FetA variable region in combination with identical *porB*, *fHbp* and *penA* alleles.

<sup>b</sup>sequence type

<sup>c</sup> clonal complex

<sup>d</sup>variable region
